# Supplementary material
Source: publisher figshare collection journal article supplement (https://acs.figshare.com/ndownloader/files/9514813)
Supplement: Supplementary file 1 [file 9514813]

# Supporting Information

## Synthesis and Characterization of ZnO/CuO Vertically-aligned Hierarchical Tree-like Nanostructure

Zhengxin Li,<sup>†</sup> Meng Jia,<sup>†</sup> Baxter Abraham,<sup>†</sup> Jolie C. Blake,<sup>†</sup> Daniel Bodine,<sup>†</sup> John Newberg,<sup>†</sup> and Lars Gundlach<sup>\*,†,‡</sup>

<sup>†</sup>*Department of Chemistry and Biochemistry, University of Delaware, 109 Lammot DuPont Laboratory, Newark, Delaware 19711, United States*

<sup>‡</sup>*Department of Physics and Astronomy, University of Delaware, 109 Lammot DuPont Laboratory, Newark, Delaware 19711, United States*

E-mail: larsg@udel.edu

Phone: +1 (302) 831-2331

ZnO, CuO, nanostructure, p-n junction, and photoelectrochemistry

Pages: 12

Contents: S1-S11

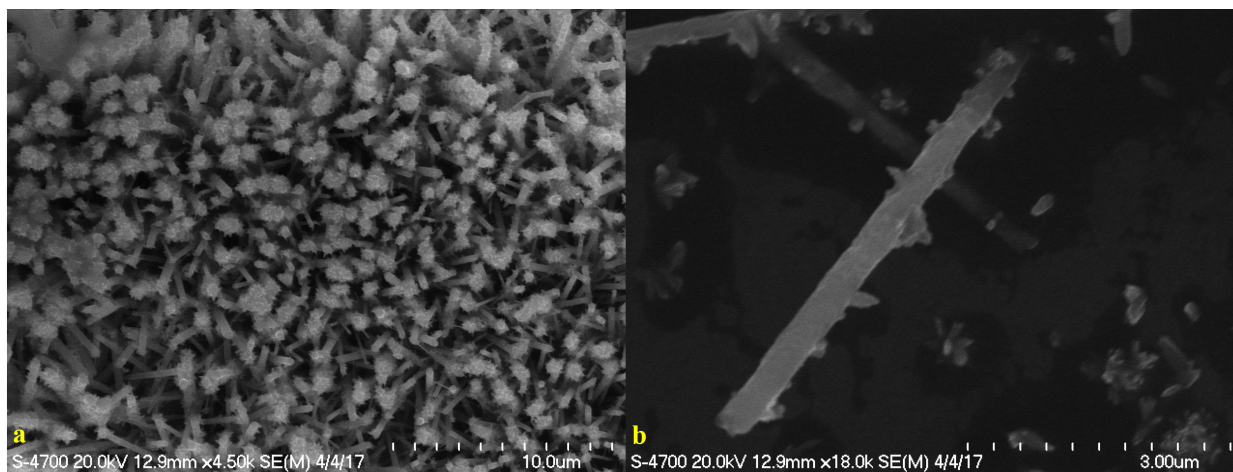

S1: SEM images of ZnO/CuO NTs (a) and a single ZnO/CuO NT (b).

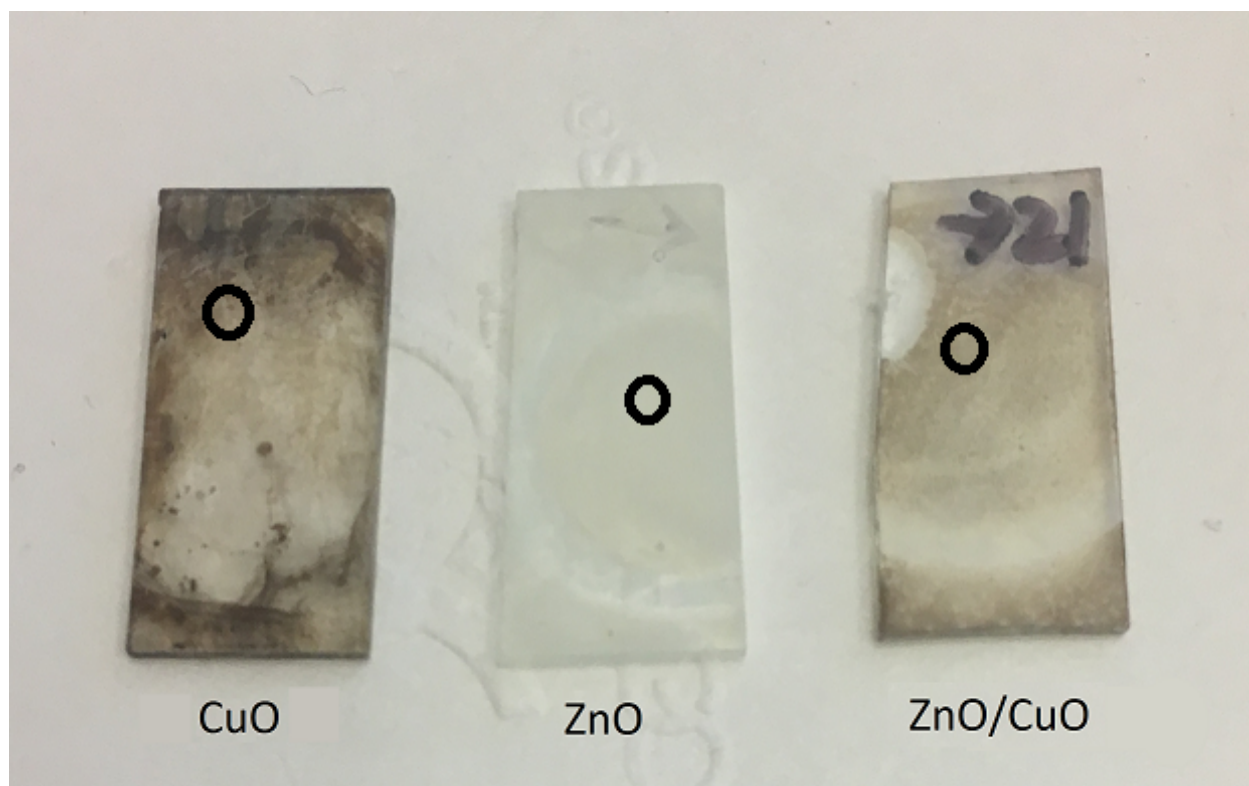

S2: Photos of CuO, ZnO, and ZnO/CuO NTs. The measuring area for SEM and UV-bis is circled.

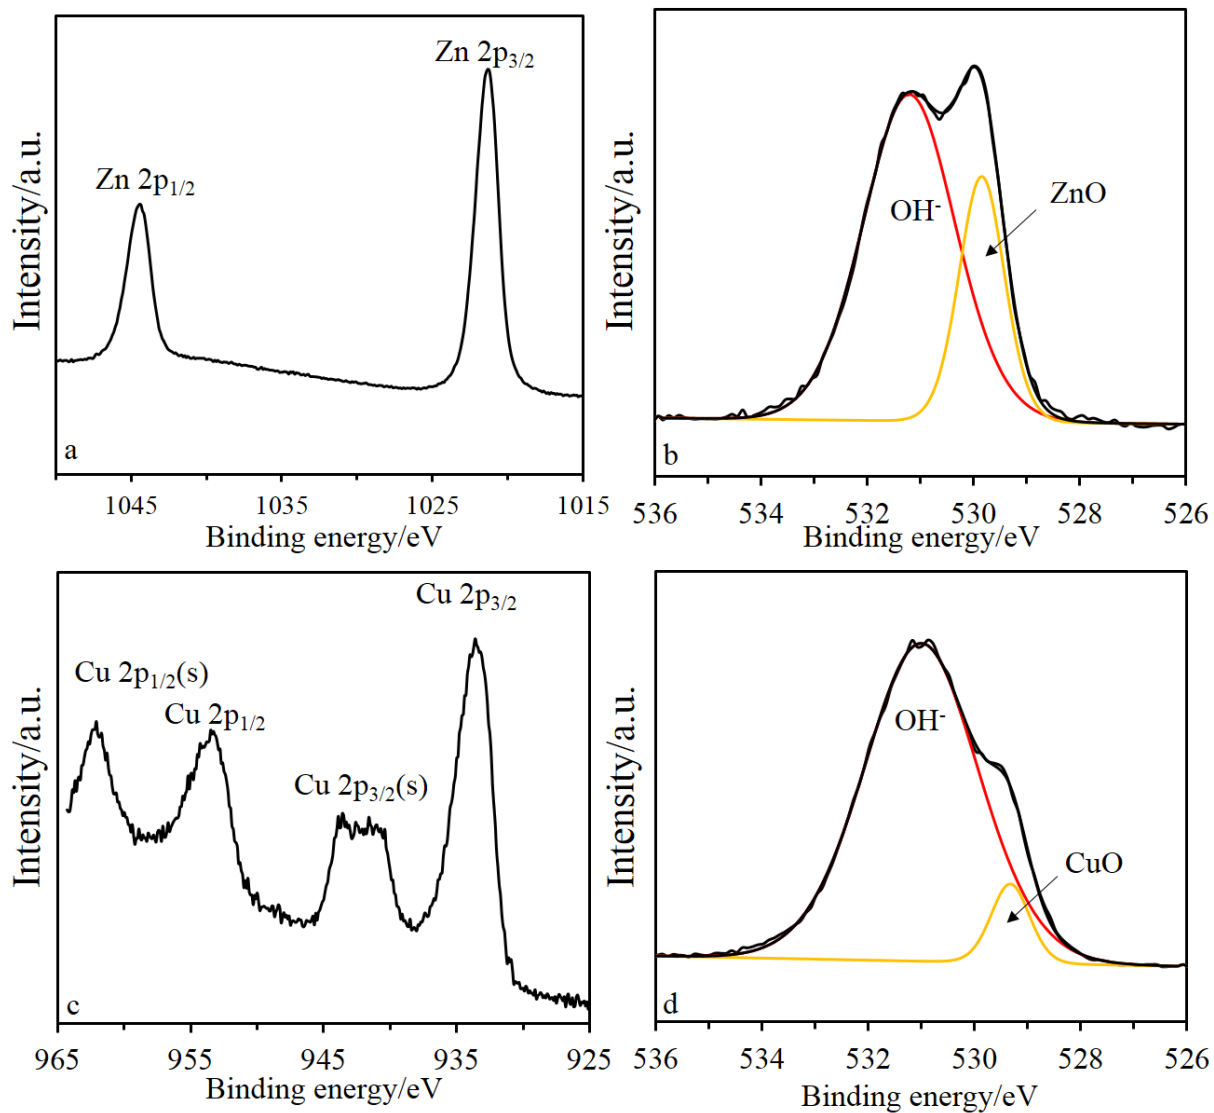

S3: XPS spectrum of Zn 2p (2p<sub>1/2</sub>: 1044.45, 2p<sub>3/2</sub>: 1021.35), O 1s in ZnO nanowires (OH<sup>-</sup>: 531.25, ZnO: 529.85), Cu 2p (2p<sub>1/2</sub>(s): 962.07, 2p<sub>1/2</sub>: 954.97, 2p<sub>3/2</sub>(s): 941.37, 2p<sub>3/2</sub>: 933.57), and O 1s in CuO nanorods (OH<sup>-</sup>: 531.97, CuO: 529.37).

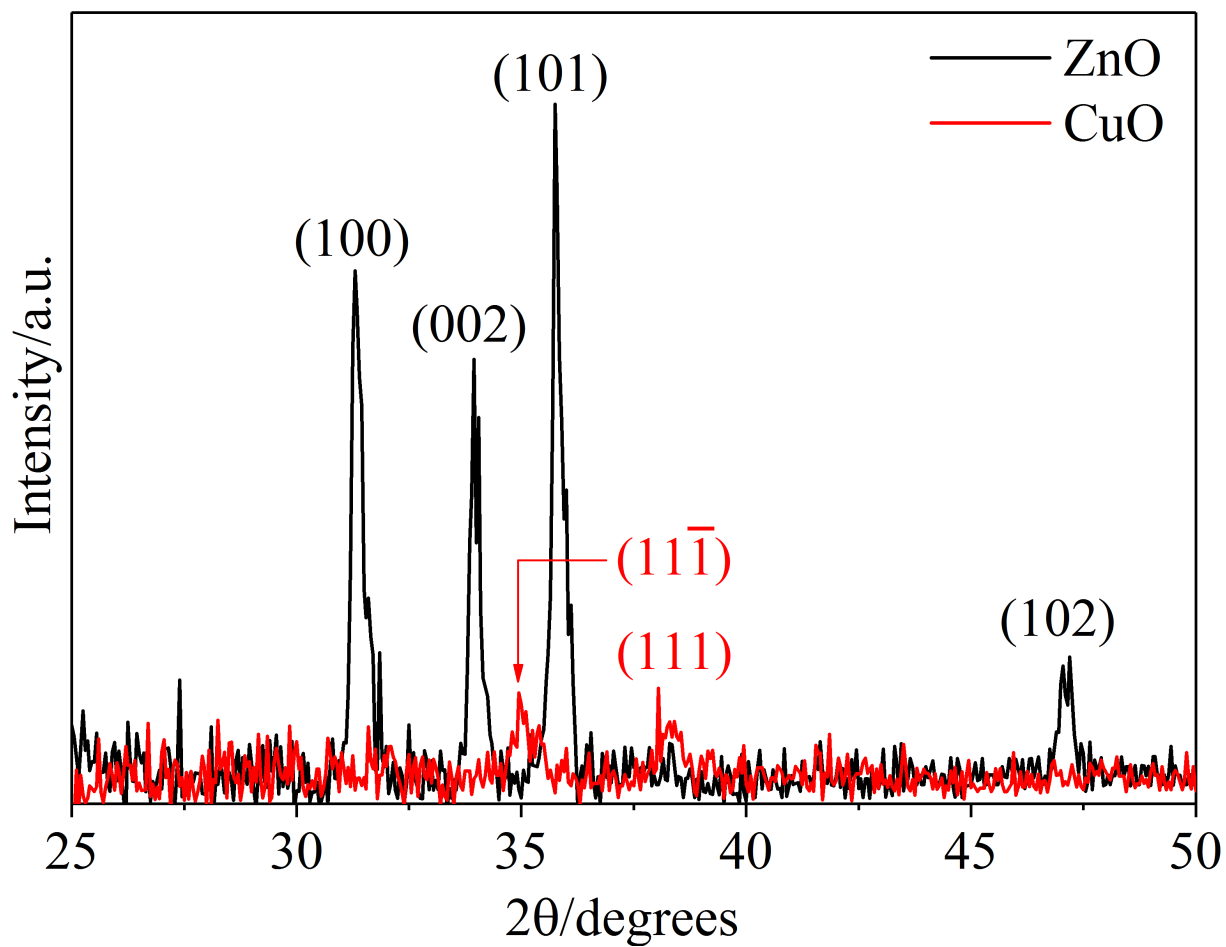

S4: High-resolution XRD spectra of ZnO nanowires in black and CuO nanorods in red.

S5: Normalize transmittance data sets to 100%

$$A = 2\log(\%T) \quad (1)$$

$$A = \log(1/R) \quad (2)$$

$$F = \frac{(1 - R)^2}{2R} \quad (3)$$

$$Ea(\text{energy in eV}) = \frac{1240}{\lambda} \quad (4)$$

Make a plot,  $\sqrt{F \times Ea}$  vs.  $Ea$  shown in inset in Figure 5. The band gap value is the intercepting point of the x axis and the tangent along with most sharply increasing  $\sqrt{F \times Ea}$ .

Reference: P. Kubelka and F. Munk, Ein Beitrag zur Optik der Farbanstriche, Z. Tech. Phys. (Leipzig) 12, 593-601(1931).

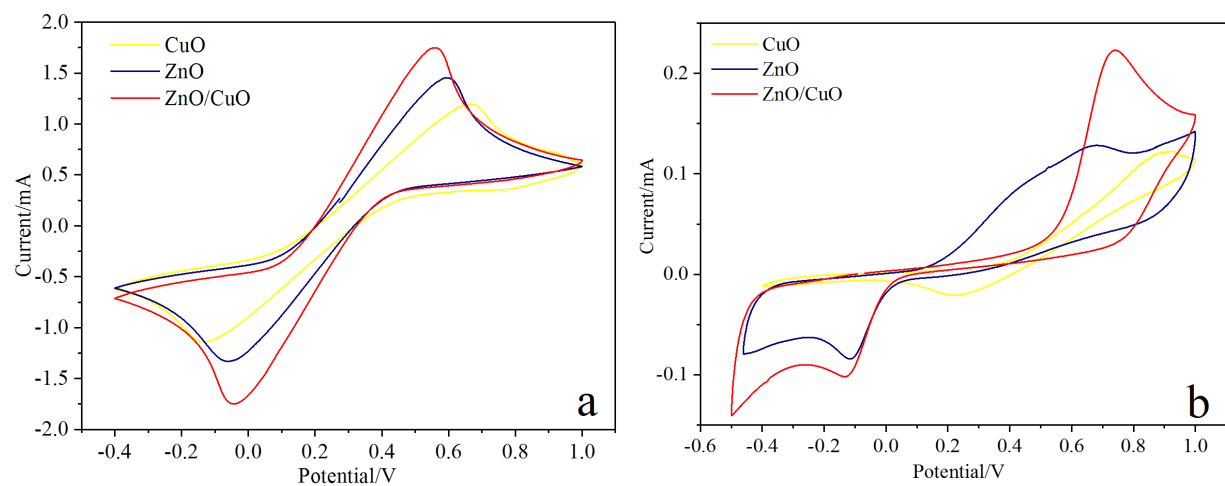

S6: CV curves of CuO, ZnO, and ZnO/CuO NTs in 1 mM  $\text{Fe}(\text{CN})_6^{3-}/\text{Fe}(\text{CN})_6^{4-}$  in 0.1 M KCl aqueous solution (a), and 1 mM ferrocene in 0.1 M  $\text{BuNF}_4$  in acetonitrile (b).

| <b>Solvent</b> | <b>Material</b> |     | <b><math>V_{FB}/V</math></b> | <b>Carrier density/cm<sup>-3</sup></b> |
|----------------|-----------------|-----|------------------------------|----------------------------------------|
| Water          | ZnO(n-type)     |     | -0.7417                      | $7.31 \times 10^{19}$                  |
|                | CuO(p-type)     |     | +0.3373                      | $1.34 \times 10^{19}$                  |
|                | ZnO/CuO         | ZnO | -0.5583                      | $1.79 \times 10^{20}$                  |
|                |                 | CuO | +0.4629                      | $8.57 \times 10^{19}$                  |
| MeCN           | ZnO(n-type)     |     | -0.8804                      | $2.28 \times 10^{19}$                  |
|                | CuO(p-type)     |     | +0.3108                      | $9.96 \times 10^{18}$                  |
|                | ZnO/CuO         | ZnO | -0.8911                      | $5.30 \times 10^{19}$                  |
|                |                 | CuO | +0.7842                      | $2.93 \times 10^{19}$                  |

S7: Flat band voltages and carrier densities of ZnO, CuO, ZnO/CuO NTs in 0.1 M KCl aqueous solution and 0.1 M BuNF<sub>4</sub> in acetonitrile.

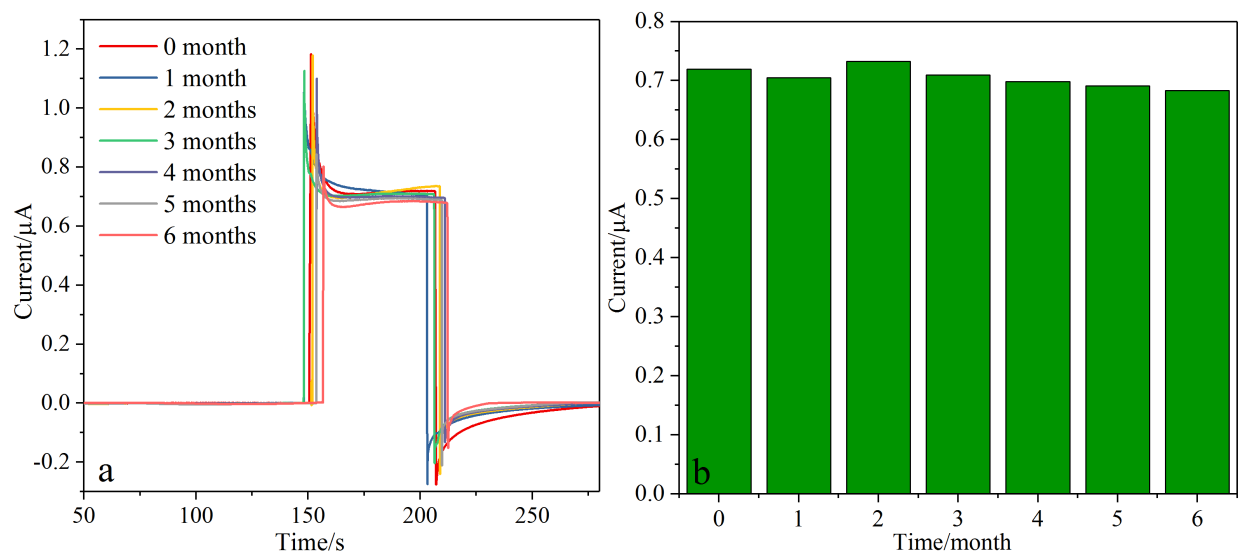

S8: Transient photocurrent curves (a) and photocurrents (b) in 0.1 M KCl aqueous solution recorded in continuous months.

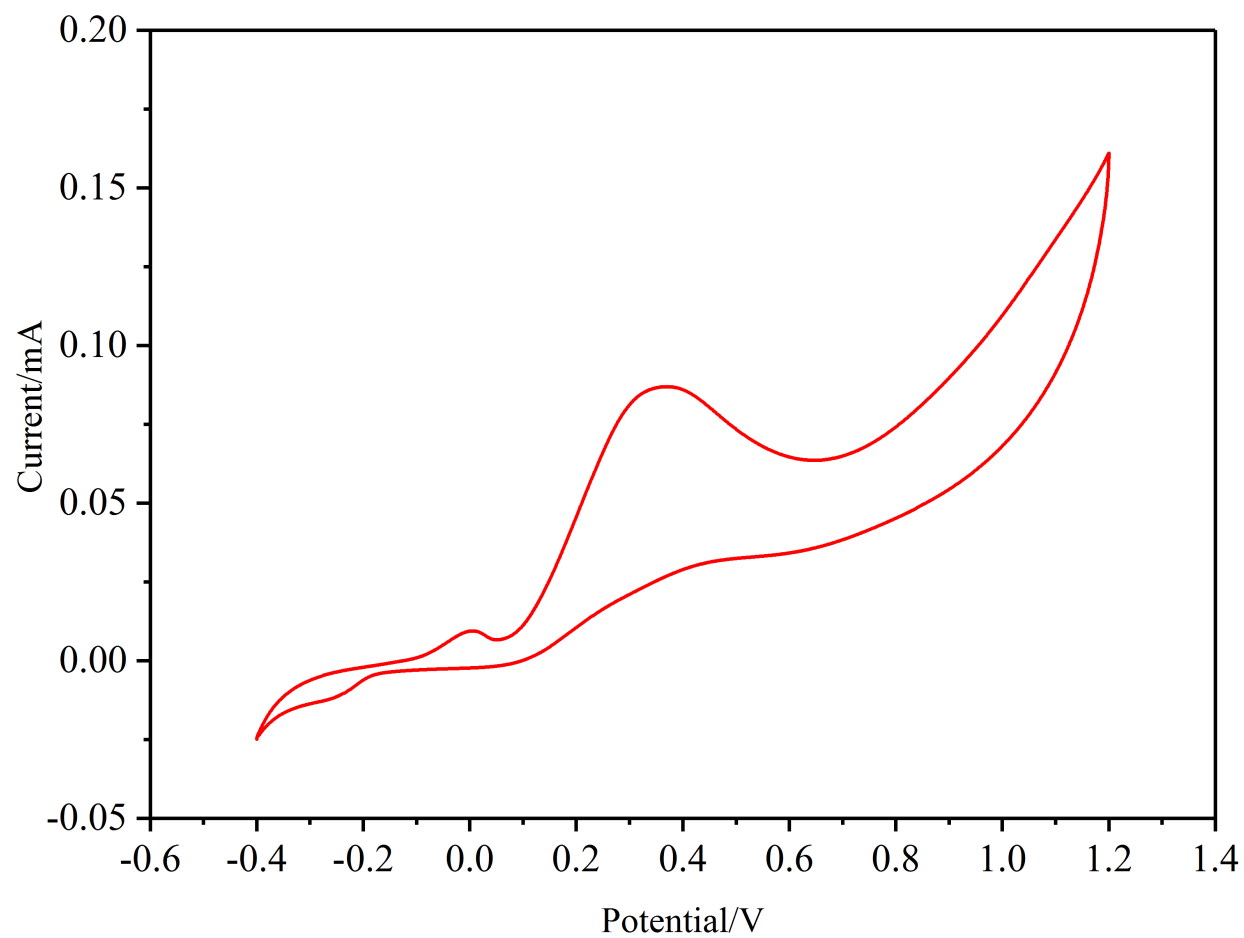

S9: CV curve of 1 mM acetic acid in 0.1 M KCl aqueous solution

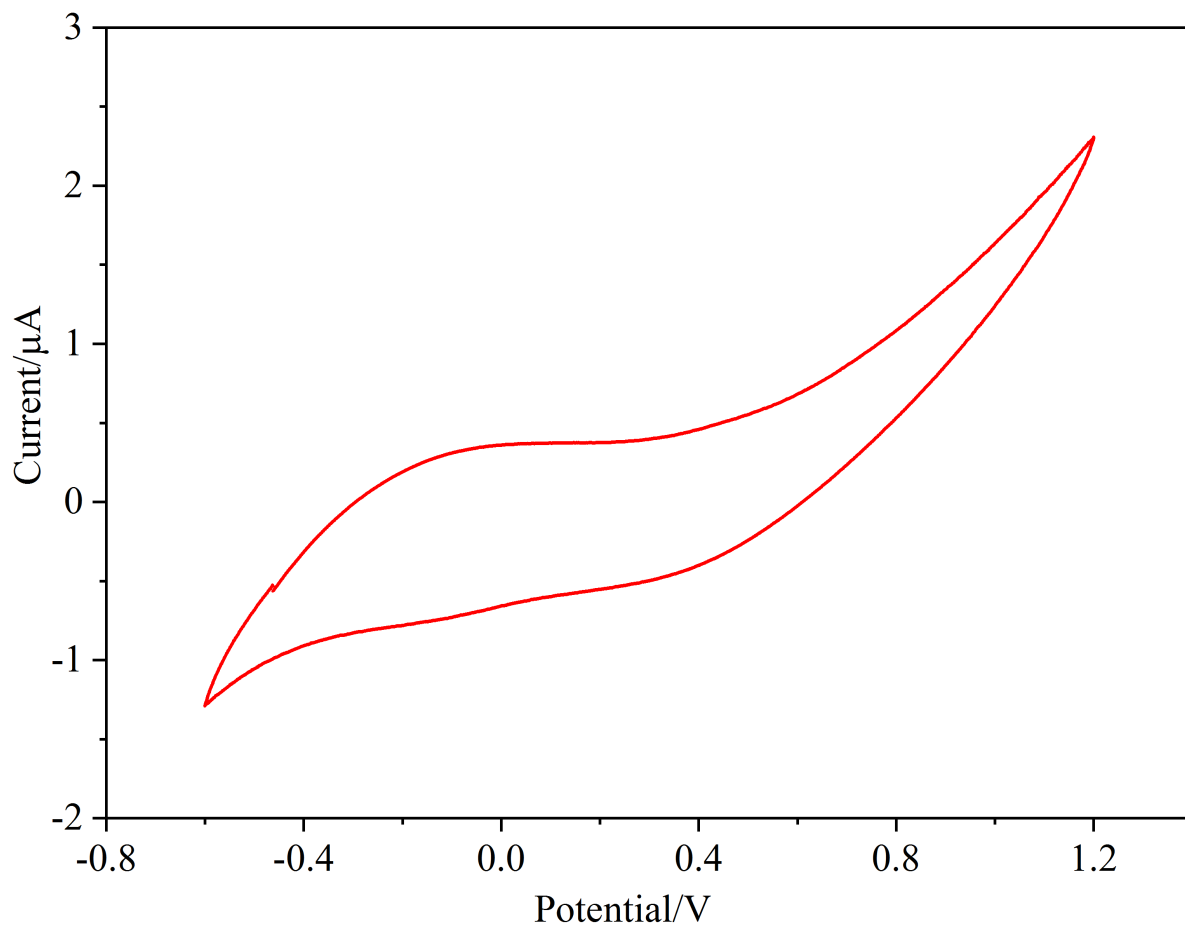

S10: CV curve of 1mM toluene in 0.1 M BuNF<sub>4</sub> in acetonitrile.

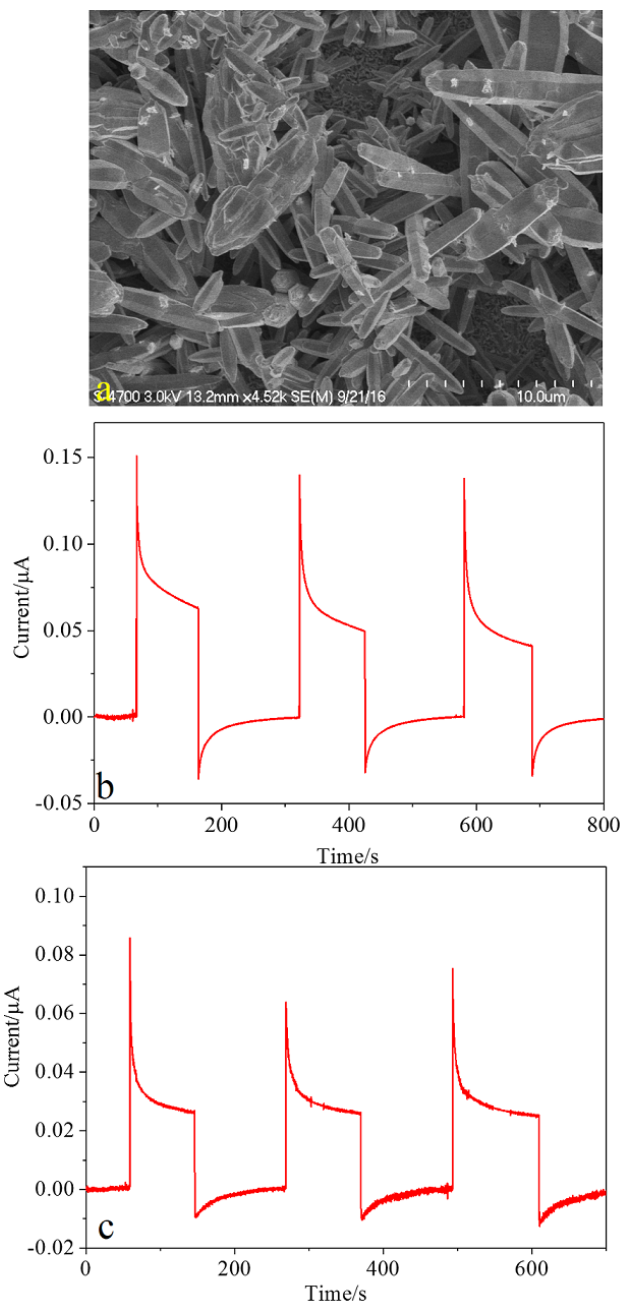

S11: a: SEM image of nontree structure of ZnO/CuO prepared without seeding process; b: transient photocurrent in 0.1 M KCl aqueous solution; and c: transient photocurrent in 0.1 M BuNF<sub>4</sub> in acetonitrile.
